# Supplementary material for: Aramid-wrapped CNT hybrid sol–gel sorbent for polycyclic aromatic hydrocarbons
Source: Royal Society of Chemistry journal article supplement (doi:10.1039/d2ra02659g), 2022-01-01
Supplement: d2ra02659g1.pdf [file d2ra02659g1.pdf]

## Supplementary Materials

### Aramid-Wrapped CNTs Hybrid Sol-gel Sorbent for Polycyclic Aromatic Hydrocarbons

Abdullah Alhendal\*, Randa Abd Almoaen, Mohamed Rashad, Ali Husain, Fouzi Mouffouk, Zahoor Ahmad

Department of Chemistry, Kuwait University, P.O. Box 5969, Safat, 13060, Kuwait.

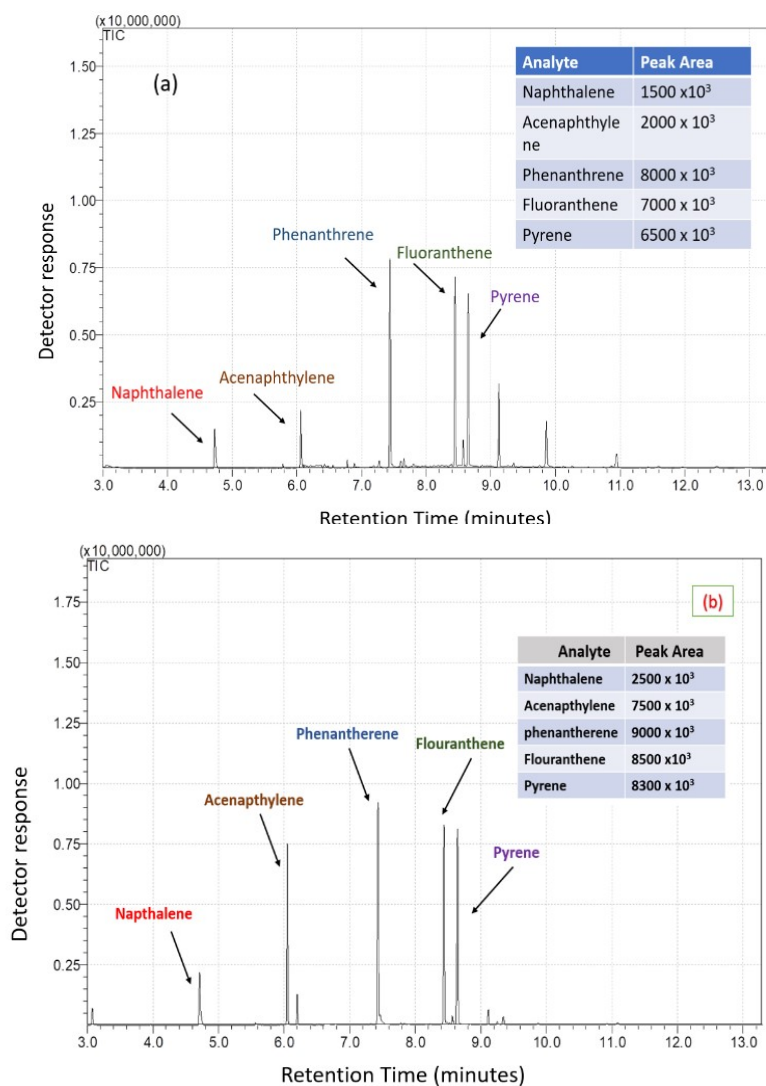

**Fig. S1:** SPME-GC-MS chromatograms for the extraction of 0.05  $\mu\text{g/L}$  PAHs mixture by (a) sol-gel APTES (no Ar-MWCNTs) sorbent (b) sol-gel Ar-CNTs sorbent.

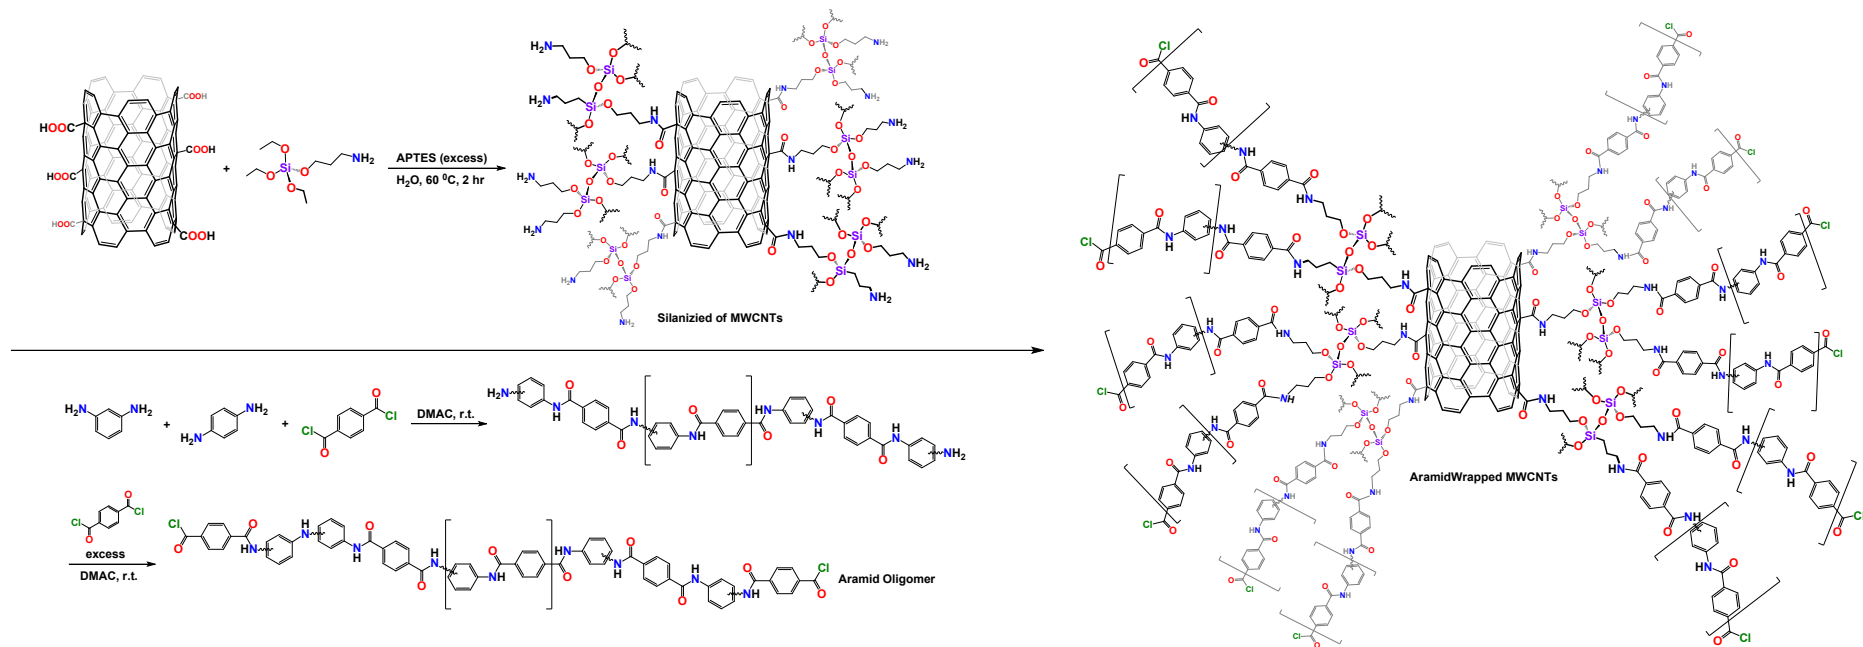

**Scheme S1.** Synthesis of Aramid-wrapped CNTs sorbent
